# Supplementary material
Source: MDPI journal article supplement (https://www.mdpi.com/2075-163X/12/9/1167)
Supplement: s1 [file s1]

# Effects of Hydrochloric Acid Pretreatment on Different Types of Clay Minerals

Bin Hu, Chunxia Zhang\* and Xiaoyan Zhang

**Table S1.** Major and minor element concentrations of kaolinite, Na-smectite, Ca-smectite, chlorite and illite samples used in our research, measured by XRF [23].

|              | LOI (%) | SUM (%) | SiO <sub>2</sub> (%) | Al <sub>2</sub> O <sub>3</sub> (%) | Fe <sub>2</sub> O <sub>3</sub> * (%) | CaO (%) | MgO (%) | K <sub>2</sub> O (%) | Na <sub>2</sub> O (%) | P <sub>2</sub> O <sub>5</sub> (ppm) | TiO <sub>2</sub> (ppm) | MnO (ppm) | FeO (%) |
|--------------|---------|---------|----------------------|------------------------------------|--------------------------------------|---------|---------|----------------------|-----------------------|-------------------------------------|------------------------|-----------|---------|
| <b>Kao</b>   | 14.1    | 100.053 | 48.68                | 35.7                               | 0.39                                 | 0.04    | 0.07    | 0.31                 | 0.26                  | 1900                                | 2600                   | 30        | 0.05    |
| <b>Na-Sm</b> | 12.11   | 100.12  | 58.41                | 17.48                              | 1.69                                 | 1.88    | 3.17    | 0.56                 | 4.45                  | 130                                 | 1100                   | 310       | 0.2     |
| <b>Ca-Sm</b> | 19.38   | 100.36  | 56.7                 | 14.5                               | 2.16                                 | 2.68    | 5.81    | 0.45                 | 0.1                   | 240                                 | 1400                   | 90        | 0.3     |
| <b>Chl</b>   | 9.32    | 100.80  | 49.85                | 6.63                               | 2.59                                 | 0.59    | 29.88   | 0.029                | 0.16                  | 470                                 | 4500                   | 70        | 1.25    |
| <b>Ill</b>   | 5.52    | 99.70   | 67.86                | 20.72                              | 0.59                                 | 0.1     | 0.43    | 3.08                 | 0.39                  | 480                                 | 8100                   | 60        | 0.15    |

\* Fe<sub>2</sub>O<sub>3</sub> means full content of Fe.

**Table S2.** Comparison of the relative element contents testing by ICP-OES and XRF.

| XRF     | Al (%) | Fe (%) | Ca (%) | Mg (%) | K (%) | Na (%) |
|---------|--------|--------|--------|--------|-------|--------|
| Kao     | 97     | 1      | 0      | 0      | 1     | 1      |
| Na-Sm   | 60     | 6      | 6      | 11     | 2     | 15     |
| Ca-Sm   | 56     | 8      | 10     | 23     | 2     | 0      |
| Chl     | 17     | 6      | 1      | 75     | 0     | 0      |
| Ill     | 82     | 2      | 0      | 2      | 12    | 2      |
| ICP-OES | Al (%) | Fe (%) | Ca (%) | Mg (%) | K (%) | Na (%) |
| Kao     | 90     | 4      | 2      | 0      | 1     | 3      |
| Na-Sm   | 53     | 6      | 8      | 12     | 3     | 18     |
| Ca-Sm   | 54     | 9      | 13     | 19     | 3     | 3      |
| Chl     | 17     | 5      | 3      | 74     | 0     | 2      |
| Ill     | 71     | 4      | 2      | 2      | 17    | 4      |

**Table S3.** Clay mineral weight contents of 24 mixed standard samples (Ill, Chl, Sme, and Kao indicate illite, chlorite, smectite, and kaolinite, respectively).

| Sample | Ill (%) | Chl (%) | Kao (%) | Sme (%) |
|--------|---------|---------|---------|---------|
| Std.8  | 93      | 7       | 0       | 0       |
| Std.9  | 60      | 40      | 0       | 0       |
| Std.10 | 0       | 3       | 0       | 97      |
| Std.11 | 0       | 10      | 0       | 90      |
| Std.12 | 0       | 20      | 0       | 80      |
| Std.13 | 0       | 0       | 7       | 93      |
| Std.14 | 0       | 0       | 62      | 38      |
| Std.15 | 0       | 0       | 23      | 77      |
| Std.16 | 5       | 11      | 0       | 84      |
| Std.17 | 15      | 3       | 0       | 82      |
| Std.18 | 30      | 4       | 0       | 66      |
| Std.19 | 63      | 12      | 0       | 25      |
| Std.20 | 25      | 29      | 0       | 46      |

|        |    |    |    |    |
|--------|----|----|----|----|
| Std.21 | 9  | 42 | 0  | 49 |
| Std.22 | 0  | 0  | 58 | 42 |
| Std.23 | 5  | 4  | 62 | 29 |
| Std.24 | 24 | 17 | 15 | 44 |
| Std.25 | 39 | 11 | 29 | 21 |
| Std.26 | 7  | 24 | 13 | 56 |
| Std.27 | 10 | 46 | 18 | 26 |
| Std.28 | 5  | 3  | 27 | 65 |
| Std.29 | 4  | 3  | 9  | 84 |
| Std.30 | 5  | 3  | 38 | 54 |
| Std.31 | 12 | 8  | 33 | 47 |

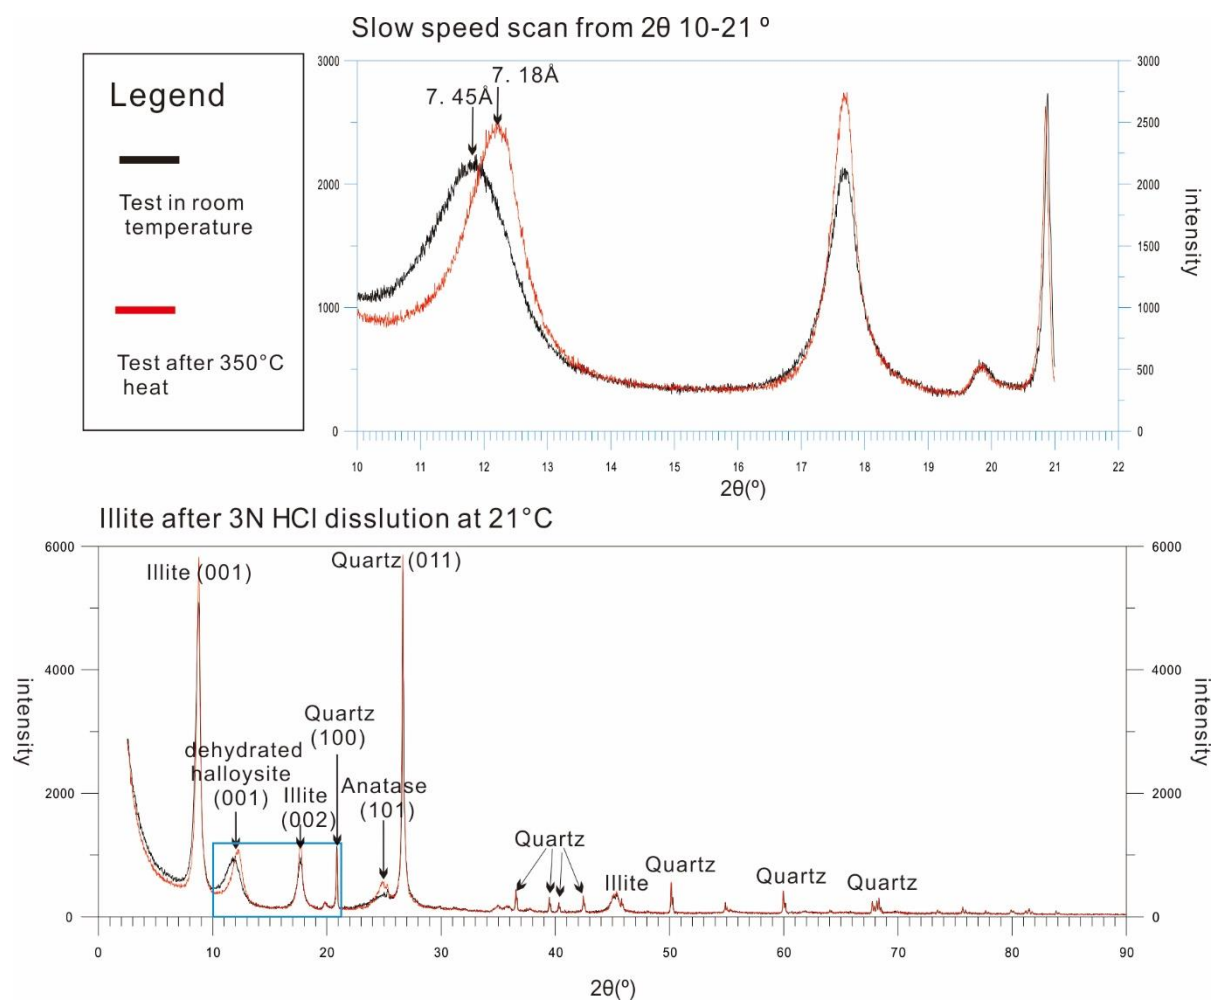

**Figure S1.** The XRD reflection of illite after 3N HCl dissolution at 21 °C, the black line is testing in room temperature and the red line is testing at 350 °C heat. The blue box circles the slow speed scan range from 10–21°  $2\theta$ .
